# Supplementary material
Source: PubMed Central journal article supplement (PMC7203971)
Supplement: NIHMS1559837-supplement-Supplemental_Material.pdf [file NIHMS1559837-supplement-Supplemental_Material.pdf]

**Supplementary Materials Table S1. Search tables**

| PubMed |                                                                                                                                                                                                                                                                                                                                                                                                                                                                                                                                                                                                                                                                                                                                                                                                                                                                                                              |           |
|--------|--------------------------------------------------------------------------------------------------------------------------------------------------------------------------------------------------------------------------------------------------------------------------------------------------------------------------------------------------------------------------------------------------------------------------------------------------------------------------------------------------------------------------------------------------------------------------------------------------------------------------------------------------------------------------------------------------------------------------------------------------------------------------------------------------------------------------------------------------------------------------------------------------------------|-----------|
| Query  | Search                                                                                                                                                                                                                                                                                                                                                                                                                                                                                                                                                                                                                                                                                                                                                                                                                                                                                                       | Results   |
| #1     | ((neoplasms[MeSH] OR neoplasm[tw] OR neoplasms[tw] OR cancer[tw] OR cancers[tw] OR cancerous[tw] OR tumor[tw] OR tumors[tw] OR tumour[tw] OR tumours[tw] OR leukemia[tw] OR malignant[tw] OR malignancy[tw] OR malignancies[tw] OR carcinoma[tw] OR carcinomas[tw] OR adenocarcinoma[tw] OR adenocarcinomas[tw] OR metastasis OR metastases[tw] OR metastatic[tw] OR sarcoma[tw] OR sarcomas[tw]) AND (survivors[mesh] OR survivors[tw] OR survivor[tw] OR survivorship[tw] OR patient[tw] OR patients[tw]))                                                                                                                                                                                                                                                                                                                                                                                                 | 1,470,149 |
| #2     | (Exercise[MeSH] OR Exercise[tw] OR Exercise Movement Techniques[MeSH] OR Exercise Movement Techniques[tw] OR Exercise Therapy[MeSH] OR Exercise Therapy[tw] OR Physical Exertion[MeSH] OR Physical Exertion[tw] OR Physical Activity[tw] OR Physical Fitness[tw] OR Physical Performance[tw] OR Physical Training[tw] OR physical endurance[mesh] OR physical endurance[tw] OR Exercise tolerance[tw] OR Sports[tw] OR Jogging[tw] OR Walking[tw] OR Running[tw] OR Swimming[tw] OR Calisthenics[tw] OR Group Exercise[tw] OR Aquatic Exercise[tw] OR Biking[tw] OR Bicycling[tw] OR Jumping[tw] OR Aerobics[tw] OR aerobic[tw] OR Anaerobic Exercises[tw] OR Strength Training[tw] OR Muscle Training[tw] OR Resistance Training[tw] OR Yoga[tw] OR Dance[tw] OR Dancing[tw] OR Stretching[tw] OR Flexibility[tw] OR Tai Chi[tw] OR Abdominal Exercises[tw] OR Plyometrics[tw] OR fitness[tw])              | 721,888   |
| #3     | (Social Determinants of Health[mesh] OR Determinants[tw] OR predictor[tw] OR Predictors[tw] OR predictive[tw] OR health behavior[mesh] OR behavior[tw] OR behaviors[tw] OR behaviour[tw] OR behaviours[tw] OR behavioral[tw] OR behavioural[tw] OR attitude[tw] OR attitudes[tw] OR Subjective norm[tw] OR subjective norms[tw] OR Intention[tw] OR Self efficacy[mesh] OR self efficacy[tw] OR self monitoring[tw] OR self monitor[tw] OR self monitored[tw] OR self monitors[tw] OR Social Support[mesh] OR social support[tw] OR social environment[tw] OR social environments[tw] OR affective judgment[tw] OR affective response[tw] OR Intrinsic goals[tw] OR Extrinsic goals[tw] OR goal setting[tw] OR autonomy[tw] OR ((outcome[tw] OR outcomes[tw]) AND (expectation[tw] OR expectations[tw])) OR knowledge[tw] OR barrier[tw] OR barriers[tw] OR decisional balance[tw] OR Process of change[tw]) | 3,130,589 |
| #4     | (Cohort studies[mesh] OR cohort[tiab] OR longitudinal[tw] OR longitudinally[tw] OR prospective[tw] OR prospectively[tw] OR follow up[tw] OR pilot study[tw]) NOT (qualitative[ti] OR protocol[ti])                                                                                                                                                                                                                                                                                                                                                                                                                                                                                                                                                                                                                                                                                                           | 2,515,776 |
| #5     | #1 AND #2 AND #3 AND #4                                                                                                                                                                                                                                                                                                                                                                                                                                                                                                                                                                                                                                                                                                                                                                                                                                                                                      | 1,437     |

**Supplementary Materials Table S2. Intercorrelation matrix of psychosocial predictors and physical activity**

|                           | 2        | 3    | 4        | 5    | 6     | 7        | 8        | 9       | 10       |
|---------------------------|----------|------|----------|------|-------|----------|----------|---------|----------|
| 1. Instrumental attitudes | 0.55     | 0.87 | 0.40     | 0.21 | 0.21  | 0.45     | 0.48     | 0.130   | 0.15     |
| <i>k</i>                  | 8        | 1    | 7        | 3    | 1     | 8        | 8        | 2       | 9        |
| <i>n</i>                  | 1344     | 377  | 1331     | 890  | 13    | 1344     | 1344     | 303     | 1393     |
| <i>CI (LB)</i>            | 0.49     | 0.84 | 0.26     | 0.15 | -0.39 | 0.33     | 0.39     | 0.01    | 0.05     |
| <i>CI (UB)</i>            | 0.74     | 0.89 | 0.52     | 0.27 | 0.68  | 0.57     | 0.56     | 0.25    | 0.26     |
| <i>Q (p)</i>              | 27.83*** | n/a  | 41.39*** | 2.73 | n/a   | 45.63*** | 21.04**  | 1.16    | 24.27**  |
| <i>I<sup>2</sup></i>      | 75%      | n/a  | 85%      | -0%  | n/a   | 83%      | 69%      | 13%     | 68%      |
| 2. Affective attitudes    |          | 0.93 | 0.33     | 0.34 | -0.05 | 0.37     | 0.49     | 0.23    | 0.18     |
| <i>k</i>                  |          | 1    | 7        | 3    | 1     | 8        | 8        | 3       | 10       |
| <i>n</i>                  |          | 377  | 1331     | 890  | 13    | 1344     | 1344     | 452     | 1542     |
| <i>CI (LB)</i>            |          | 0.91 | 0.21     | 0.28 | -0.58 | 0.15     | 0.40     | 0.06    | 0.09     |
| <i>CI (UB)</i>            |          | 0.94 | 0.44     | 0.40 | 0.52  | 0.56     | 0.57     | 0.38    | 0.27     |
| <i>Q (p)</i>              |          | n/a  | 33.36*** | 3.08 | n/a   | 36.08*** | 20.97    | 6.68*   | 23.19**  |
| <i>I<sup>2</sup></i>      |          | n/a  | 78%      | -0%  | n/a   | 93%      | 69%      | 68%     | 60%      |
| 3. Overall attitudes      |          |      | 0.34     | 0.28 | 0.23  | 0.39     | 0.45     | 0.11    | 0.18     |
| <i>k</i>                  |          |      | 10       | 3    | 2     | 14       | 12       | 5       | 19       |
| <i>n</i>                  |          |      | 1503     | 890  | 1540  | 2626     | 3043     | 475     | 4158     |
| <i>CI (LB)</i>            |          |      | 0.22     | 0.18 | 0.18  | 0.28     | 0.36     | -0.06   | 0.12     |
| <i>CI (UB)</i>            |          |      | 0.45     | 0.38 | 0.28  | 0.49     | 0.53     | 0.28    | 0.24     |
| <i>Q (p)</i>              |          |      | 53.56*** | 4.42 | 0.24  | 63.54*** | 74.32*** | 10.57** | 40.85**  |
| <i>I<sup>2</sup></i>      |          |      | 81%      | 56%  | 0%    | 85%      | 81%      | 67%     | 65%      |
| 4. Instrumental norms     |          |      |          | 0.43 | -     | 0.36     | 0.34     | 0.07    | 0.14     |
| <i>k</i>                  |          |      |          | 3    | -     | 10       | 10       | 5       | 10       |
| <i>n</i>                  |          |      |          | 890  | -     | 1503     | 1503     | 475     | 1453     |
| <i>CI (LB)</i>            |          |      |          | 0.37 | -     | 0.29     | 0.27     | -0.02   | 0.07     |
| <i>CI (UB)</i>            |          |      |          | 0.48 | -     | 0.43     | 0.41     | 0.16    | 0.21     |
| <i>Q (p)</i>              |          |      |          | 0.75 | -     | 17.88*   | 16.46    | 2.18    | 13.15    |
| <i>I<sup>2</sup></i>      |          |      |          | 0%   | -     | 47%      | 48%      | 0.70    | 30%      |
| 5. Descriptive norms      |          |      |          |      | 0.19  | 0.16     | 0.30     | -       | 0.07     |
| <i>k</i>                  |          |      |          |      | 1     | 4        | 3        | -       | 4        |
| <i>n</i>                  |          |      |          |      | 85    | 978      | 890      | -       | 960      |
| <i>CI (LB)</i>            |          |      |          |      | -0.02 | 0.002    | 0.24     | -       | 0.01     |
| <i>CI (UB)</i>            |          |      |          |      | 0.39  | 0.30     | 0.36     | -       | 0.14     |
| <i>Q (p)</i>              |          |      |          |      | n/a   | 12.93    | 0.82     | -       | 2.89     |
| <i>I<sup>2</sup></i>      |          |      |          |      | n/a   | 0.004    | 0%       | -       | 0.02%    |
| 6. Social support         |          |      |          |      |       | 0.02     | 0.13     | -       | 0.13     |
| <i>k</i>                  |          |      |          |      |       | 2        | 2        | -       | 8        |
| <i>n</i>                  |          |      |          |      |       | 99       | 1540     | -       | 685      |
| <i>CI (LB)</i>            |          |      |          |      |       | -0.18    | -0.42    | -       | -0.01    |
| <i>CI (UB)</i>            |          |      |          |      |       | 0.22     | 0.61     | -       | 0.27     |
| <i>Q (p)</i>              |          |      |          |      |       | 0.23     | 3.69     | -       | 9.51*    |
| <i>I<sup>2</sup></i>      |          |      |          |      |       | 0%       | 73%      | -       | 69%      |
| 7. Self-efficacy          |          |      |          |      |       |          | 0.45     | 0.16    | 0.26     |
| <i>k</i>                  |          |      |          |      |       |          | 11       | 5       | 18       |
| <i>n</i>                  |          |      |          |      |       |          | 1516     | 475     | 2597     |
| <i>CI (LB)</i>            |          |      |          |      |       |          | 0.35     | 0.07    | 0.20     |
| <i>CI (UB)</i>            |          |      |          |      |       |          | 0.53     | 0.25    | 0.33     |
| <i>Q (p)</i>              |          |      |          |      |       |          | 38.84*** | 4.42    | 43.19*** |
| <i>I<sup>2</sup></i>      |          |      |          |      |       |          | 72%      | 0%      | 58%      |
| 8. Intention              |          |      |          |      |       |          |          | 0.27    | 0.33     |
| <i>k</i>                  |          |      |          |      |       |          |          | 5       | 12       |
| <i>n</i>                  |          |      |          |      |       |          |          | 475     | 2993     |
| <i>CI (LB)</i>            |          |      |          |      |       |          |          | 0.13    | 0.25     |
| <i>CI (UB)</i>            |          |      |          |      |       |          |          | 0.40    | 0.40     |
| <i>Q (p)</i>              |          |      |          |      |       |          |          | 8.59    | 31.31**  |
| <i>I<sup>2</sup></i>      |          |      |          |      |       |          |          | 54%     | 70%      |
| 9. Past Behavior          |          |      |          |      |       |          |          |         | 0.40     |
| <i>k</i>                  |          |      |          |      |       |          |          |         | 8        |
| <i>n</i>                  |          |      |          |      |       |          |          |         | 685      |
| <i>CI (LB)</i>            |          |      |          |      |       |          |          |         | 0.33     |
| <i>CI (UB)</i>            |          |      |          |      |       |          |          |         | 0.46     |
| <i>Q (p)</i>              |          |      |          |      |       |          |          |         | 6.07     |
| <i>I<sup>2</sup></i>      |          |      |          |      |       |          |          |         | 0%       |
| 10. Physical activity     |          |      |          |      |       |          |          |         |          |

**Note.** *k* = number of independent tests, *N* = number of participants, *CI*, *Q* and *I<sup>2</sup>* = homogeneity statistics, \* *p* < 0.05, \*\* *p* < 0.01, \*\*\* *p* < 0.001, -- indicates the intercorrelation was not present in any studies.

**Supplementary Materials Table S3. Demographics of participants by study**

| Author (Year)                | Gender | Age     | Marital status | BMI     |
|------------------------------|--------|---------|----------------|---------|
| Basen-Engquis et al. (2013)  | 0      | 57 (11) |                | 34 (9)  |
| Brunet et al. (2013)         | 0      | 54 (11) |                | 26 (5)  |
| Cadmus-Bertram et al. (2013) | 0      | 60 (7)  |                | 30 (4)  |
| Castonguay et al. (2017)     | 0      | 55 (11) |                | 26 (5)  |
| Courneya et al. (1999)       | 58     | 61 (12) | 68             | 26 (5)  |
| Courneya et al. (2001)       | 0      | 51 (7)  | 83             |         |
| Courneya et al. (2004)       | 33     | 55 (8)  | 63             |         |
| Courneya et al. (2004)       | 58     | 60 (10) | 76             |         |
| Courneya et al. (2004)       | 100    |         | 84             |         |
| Courneya et al. (2008)       | 0      | 49 (--) | 64             |         |
| Courneya et al. (2009)       | 0      |         | 65             |         |
| Courneya et al. (2012)       | 59     | 53 (--) | 80             |         |
| Emery et al. (2009)          | 0      | 51 (11) | 67             |         |
| Endrighi et al. (2016)       | 0      | 57 (11) |                | 34 (9)  |
| Fallon et al. (2018)         | 52     | 62 (11) | 71             |         |
| Karvinen et al. (2009)       | 75     | 70 (11) |                |         |
| Loprinzi et al. (2012)       | 0      | 72 (1)  | 63             | 28 (1)  |
| Mack et al. (2013)           | 0      | 55 (11) | 65             |         |
| Mama et al. (2017)           | 0      | 59 (9)  |                | 31(7)   |
| Morielli et al. (2017)       | 71     |         | 65             |         |
| Peddle et al. (2009)         | 32     | 64 (10) | 95             | 27 (--) |
| Phillips et al. (2013)       | 0      | 56 (9)  | 72             | 27 (6)  |
| Pinto et al. (2009)          | 0      | 53 (9)  | 84             |         |
| Rabin et al. (2006)          | 0      | 56 (10) |                |         |
| Vallance et al. (2010)       | 0      | 58 (--) | 72             | 28 (6)  |

**Note.** Age = mean age of sample in years and (standard deviation); Gender = percent of sample reported as male; BMI = mean BMI of sample and (standard deviation); Marital Status = percent of sample married or cohabitating, -- indicates the characteristic was not reported in the study.

**Supplementary Materials. References for Studies Included in the Meta-Analysis**

- Abraham, C., & Michie, S. (2008). A taxonomy of behavior change techniques used in interventions. *Health Psychol*, 27(3), 379-387. doi:10.1037/0278-6133.27.3.379
- Ajzen, I. (1991). The Theory of Planned Behavior. *Organizational Behavior and Human Decision Processes*, 50(2), 179-211. doi:[https://doi.org/10.1016/0749-5978\(91\)90020-T](https://doi.org/10.1016/0749-5978(91)90020-T)
- Ajzen, I. (2002). Perceived Behavioral Control, Self-Efficacy, Locus of Control, and the Theory of Planned Behavior. *Journal of Applied Social Psychology*, 32(4), 665-683.
- Albarracin, D., & Wyer, R. S., Jr. (2000). The cognitive impact of past behavior: influences on beliefs, attitudes, and future behavioral decisions. *J Pers Soc Psychol*, 79(1), 5-22.
- Balogh, E. P. (2018). Incorporating Weight Management and Physical Activity Throughout the Cancer Care Continuum: Proceedings of a Workshop. doi:10.17226/24925
- Bandura, A. (2004). Health promotion by social cognitive means. *Health Educ Behav*, 31(2), 143-164. doi:10.1177/1090198104263660
- Begg, C. B., & Mazumdar, M. (1994). Operating characteristics of a rank correlation test for publication bias. *Biometrics*, 50(4), 1088-1101.
- Bélanger-Gravel, A., Godin, G., & Amireault, S. (2013). A meta-analytic review of the effect of implementation intentions on physical activity. *Health Psychology Review*, 7(1), 23-54. doi:10.1080/17437199.2011.560095
- Blanchard, C. M., Courneya, K. S., & Stein, K. (2008). Cancer survivors' adherence to lifestyle behavior recommendations and associations with health-related quality of life: results from the American Cancer Society's SCS-II. *J Clin Oncol*, 26(13), 2198-2204. doi:10.1200/JCO.2007.14.6217

- Brunet, J., Burke, S. M., & Sabiston, C. M. (2013). The benefits of being self-determined in promoting physical activity and affective well-being among women recently treated for breast cancer. *Psychooncology*, 22(10), 2245-2252. doi:10.1002/pon.3287
- Cialdini, R. B., Kallgren, C. A., & Reno, R. R. (1991). A Focus Theory of Normative Conduct: A Theoretical Refinement and Reevaluation of the Role of Norms in Human Behavior. *Advances in Experimental Social Psychology*, 24, 201- 234.
- Cohen, J. (1992). A power primer. *Psychological Bulletin*, 112(1), 155-159. doi:10.1037/0033-2909.112.1.155
- Cormie, P., Zopf, E. M., Zhang, X., & Schmitz, K. H. (2017). The Impact of Exercise on Cancer Mortality, Recurrence, and Treatment-Related Adverse Effects. *Epidemiol Rev*, 39(1), 71-92. doi:10.1093/epirev/mxx007
- Courneya, K. S., Friedenreich, C. M., Sela, R. A., Quinney, H. A., Rhodes, R. E., & Jones, L. W. (2004). Exercise motivation and adherence in cancer survivors after participation in a randomized controlled trial: an attribution theory perspective. *Int J Behav Med*, 11(1), 8-17. doi:10.1207/s15327558ijbm1101\_2
- Denlinger, C. S., Carlson, R. W., Are, M., Baker, K. S., Davis, E., Edge, S. B., . . . Freedman-Cass, D. (2014). Survivorship: introduction and definition. Clinical practice guidelines in oncology. *J Natl Compr Canc Netw*, 12(1), 34-45.
- Gardner, B. (2015). A review and analysis of the use of 'habit' in understanding, predicting and influencing health-related behaviour. *Health Psychol Rev*, 9(3), 277-295. doi:10.1080/17437199.2013.876238

- Gollwitzer, P. M., & Sheeran, P. (2006). Implementation intentions and goal achievement: A meta-analysis of effects and processes. *Advances in Experimental Social Psychology*(38), 69-119. doi:[http://doi.org/10.1016/50065-2601\(06\)38002-1](http://doi.org/10.1016/50065-2601(06)38002-1)
- Hagger, M. S., Chatzisarantis, N. L. D., & Biddle, S. J. H. (2002). A meta-analytic review of the theories of reasoned action and planned behavior in physical activity: Predictive validity and the contribution of additional variables. *Journal of Sport & Exercise Psychology*, 24(1), 3-32. doi:DOI 10.1123/jsep.24.1.3
- Hagger, M. S., Polet, J., & Lintunen, T. (2018). The reasoned action approach applied to health behavior: Role of past behavior and tests of some key moderators using meta-analytic structural equation modeling. *Soc Sci Med*, 213, 85-94.  
doi:10.1016/j.socscimed.2018.07.038
- Harkin, B., Webb, T. L., Chang, B. P., Prestwich, A., Conner, M., Kellar, I., . . . Sheeran, P. (2016). Does monitoring goal progress promote goal attainment? A meta-analysis of the experimental evidence. *Psychol Bull*, 142(2), 198-229. doi:10.1037/bul0000025
- Higgins, J. P., Thompson, S. G., Deeks, J. J., & Altman, D. G. (2003). Measuring inconsistency in meta-analyses. *BMJ*, 327(7414), 557-560. doi:10.1136/bmj.327.7414.557
- Jak, S. (2015). *Meta-analytic structural equation modelling*. Dordrecht, Neth: Springer.
- Karvinen, K. H., Courneya, K. S., Plotnikoff, R. C., Spence, J. C., Venner, P. M., & North, S. (2009). A prospective study of the determinants of exercise in bladder cancer survivors using the Theory of Planned Behavior. *Support Care Cancer*, 17(2), 171-179.  
doi:10.1007/s00520-008-0471-8

- Loprinzi, P. D., & Lee, H. (2014). Rationale for promoting physical activity among cancer survivors: literature review and epidemiologic examination. *Oncol Nurs Forum*, *41*(2), 117-125. doi:10.1188/14.ONF.117-125
- Mack, D. E., Meldrum, L. S., Wilson, P. M., & Sabiston, C. M. (2013). Physical activity and psychological health in breast cancer survivors: an application of basic psychological needs theory. *Appl Psychol Health Well Being*, *5*(3), 369-388. doi:10.1111/aphw.12016
- Moher, D., Liberati, A., Tetzlaff, J., Altman, D. G., & Group, P. (2009). Preferred reporting items for systematic reviews and meta-analyses: the PRISMA statement. *PLoS Med*, *6*(7), e1000097. doi:10.1371/journal.pmed.1000097
- National Cancer Institute. (2018). Cancer Statistics. Retrieved from <https://www.cancer.gov/about-cancer/understanding/statistics>
- O'Neill, S. C., DeFrank, J. T., Vegella, P., Richman, A. R., Henry, L. R., Carey, L. A., & Brewer, N. T. (2013). Engaging in health behaviors to lower risk for breast cancer recurrence. *PLoS One*, *8*(1), e53607. doi:10.1371/journal.pone.0053607
- Prochaska, J. O., & Velicer, W. F. (1997). The transtheoretical model of health behavior change. *Am J Health Promot*, *12*(1), 38-48. doi:10.4278/0890-1171-12.1.38
- Rhodes, R., McEwan, D., & L. Rebar, A. (2018). *Theories of physical activity behaviour change: A history and synthesis of approaches*.
- Rhodes, R. E., Mark, R. S., & Temmel, C. P. (2012). Adult sedentary behavior: a systematic review. *Am J Prev Med*, *42*(3), e3-28. doi:10.1016/j.amepre.2011.10.020
- Rich, A., Brandes, K., Mullan, B., & Hagger, M. S. (2015). Theory of planned behavior and adherence in chronic illness: a meta-analysis. *J Behav Med*, *38*(4), 673-688. doi:10.1007/s10865-015-9644-3

- Rivis, A., & Sheeran, P. (2003). Descriptive Norms as an Additional Predictor in the Theory of Planned Behaviour: A Meta-Analysis. *Current Psychology*, 22(3), 218-233.
- Rock, C. L., Doyle, C., Demark-Wahnefried, W., Meyerhardt, J., Courneya, K. S., Schwartz, A. L., . . . Gansler, T. (2012). Nutrition and physical activity guidelines for cancer survivors. *CA Cancer J Clin*, 62(4), 243-274. doi:10.3322/caac.21142
- Ryan, R. M., & Deci, E. L. (2017). *Self-determination theory: Basic psychological needs in motivation, development, and wellness*. New York, NY, US: Guilford Press.
- Sallis, J. F., Grossman, R. M., Pinski, R. B., Patterson, T. L., & Nader, P. R. (1987). The development of scales to measure social support for diet and exercise behaviors. *Prev Med*, 16(6), 825-836.
- Sandberg, T., & Conner, M. (2007). *Anticipated regret as an additional predictor in the theory of planned behavior: A meta-analysis* (Vol. 47).
- Sheeran, P., Abraham, C., & Orbell, S. (1999). Psychosocial correlates of heterosexual condom use: A meta-analysis. *Psychological Bulletin*, 125(1), 90-132. doi:10.1037/0033-2909.125.1.90
- Sheeran, P., Klein, W. M., & Rothman, A. J. (2017). Health Behavior Change: Moving from Observation to Intervention. *Annu Rev Psychol*, 68, 573-600. doi:10.1146/annurev-psych-010416-044007
- Sheeran, P., Trafimow, D., & Armitage, C. J. (2003). Predicting behaviour from perceived behavioural control: tests of the accuracy assumption of the theory of planned behaviour. *Br J Soc Psychol*, 42(Pt 3), 393-410. doi:10.1348/014466603322438224
- Sheeran, P., & Webb, T. L. (2016). The Intention-Behavior Gap. *Social and Personality Psychology Compass*, 10(9), 503-518. doi:10.1111/spc3.12265



- Tooth, L., Ware, R., Bain, C., Purdie, D. M., & Dobson, A. (2005). Quality of reporting of observational longitudinal research. *Am J Epidemiol*, *161*(3), 280-288.  
doi:10.1093/aje/kwi042
- Trafimow, D., & Sheeran, P. (1998). Some Tests of the Distinction between Cognitive and Affective Beliefs. *Journal of Experimental Social Psychology*, *34*, 378-397.
- Vallerand, J. R., Rhodes, R. E., Walker, G. J., & Courneya, K. S. (2016a). Explaining the Aerobic Exercise Intention-behavior Gap in Cancer Survivors. *Am J Health Behav*, *40*(5), 675-684. doi:10.5993/AJHB.40.5.15
- Vallerand, J. R., Rhodes, R. E., Walker, G. J., & Courneya, K. S. (2016b). Understanding strength exercise intentions and behavior in hematologic cancer survivors: an analysis of the intention-behavior gap. *J Cancer Surviv*, *10*(6), 945-955. doi:10.1007/s11764-016-0540-9
- van Leeuwen, M., Husson, O., Alberti, P., Arraras, J. I., Chinot, O. L., Costantini, A., . . . Eortc, Q. L. G. (2018). Understanding the quality of life (QOL) issues in survivors of cancer: towards the development of an EORTC QOL cancer survivorship questionnaire. *Health Qual Life Outcomes*, *16*(1), 114. doi:10.1186/s12955-018-0920-0
- Webb, T. L., & Sheeran, P. (2006). Does changing behavioral intentions engender behavior change? A meta-analysis of the experimental evidence. *Psychological Bulletin*, *132*, 249-268.
